# Supplementary material
Source: PubMed Central journal article supplement (PMC6248128)
Supplement: jamadermatol-154-1304-s002.pdf [file jamadermatol-154-1304-s002.pdf]

## Data Sharing Statement

Jull. Prescribed Exercise With Compression vs Compression Alone in Treating Patients With Venous Leg Ulcers. *JAMA Dermatol*. Published November 14, 2018. 10.1001/jamadermatol.2018.3281

### Data

**Data available:** No

### Additional Information

**Explanation for why data not available:** This was a systematic review summarising data from other published studies- the protocol is available on request (or can be published as a supplementary document as it has been submitted with the paper).
